# Supplementary material for: Low-temperature sprayed carbon electrode in modular HTL-free perovskite solar cells: a comparative study on the choice of carbon sources
Source: Royal Society of Chemistry journal article supplement (doi:10.1039/d0tc05528j), 2021-01-01
Supplement: d0tc05528j1.pdf [file d0tc05528j1.pdf]

## Supporting information

# Low-temperature sprayed carbon electrode in modular HTL-free perovskite solar cells: comparative study on the choice of carbon sources

Ransheng Chen,<sup>a</sup> Yulin Feng,<sup>ab</sup> Jing Liu,<sup>a</sup> Minhuan Wang,<sup>a</sup> Hongru Ma,<sup>b</sup>

Jiming Bian\*<sup>a</sup> and Yantao Shi\*<sup>b</sup>

<sup>a</sup> Key Laboratory of Materials Modification by Laser, Ion and Electron Beams (Ministry of Education), School of Physics, Dalian University of Technology, Dalian 116024, China

<sup>b</sup> State Key Laboratory of Fine Chemicals, School of Chemistry, Dalian University of Technology, Dalian 116024, China

\*Corresponding authors (emails: [jmbian@dlut.edu.cn](mailto:jmbian@dlut.edu.cn) (Bian J); emails: [shiyantao@dlut.edu.cn](mailto:shiyantao@dlut.edu.cn) (Shi Y))

**Table S1.** A summary of device structure and photovoltaic performance of C-PSCs.

| Carbon-electrode PSCs Structure                                                                                                                                           | Perovskite                                                                                                                         | Cell Area (cm <sup>2</sup> ) | V <sub>oc</sub> (V) | J <sub>sc</sub> (mA cm <sup>-2</sup> ) | PCE (%) | Ref. |
|---------------------------------------------------------------------------------------------------------------------------------------------------------------------------|------------------------------------------------------------------------------------------------------------------------------------|------------------------------|---------------------|----------------------------------------|---------|------|
| 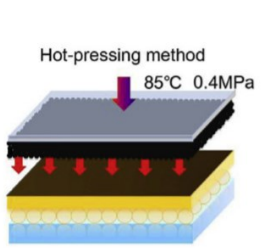 <p>Hot-pressing method<br/>85°C 0.4MPa</p>                                            | Cs <sub>0.05</sub> (MA <sub>0.17</sub> FA <sub>0.83</sub> ) <sub>0.95</sub> Pb(I <sub>0.83</sub> Br <sub>0.17</sub> ) <sub>3</sub> | 0.30                         | 0.89                | 22.29                                  | 10.84   | 11   |
|                                                                                                                                                                           |                                                                                                                                    | 1.00                         | 0.84                | 22.39                                  | 8.72    |      |
|  <p>Carbon<br/>CNT<br/>Perovskite + M.P.TiO<sub>2</sub><br/>Blocking layer<br/>FTO</p> | Cs <sub>0.06</sub> (MA <sub>0.17</sub> FA <sub>0.83</sub> ) <sub>0.94</sub> Pb(I <sub>0.84</sub> Br <sub>0.16</sub> ) <sub>3</sub> | 0.12                         | 0.96                | 18.66                                  | 13.57   | 48   |
|                                                                                                                                                                           |                                                                                                                                    | 1.00                         | 0.99                | 17.57                                  | 8.18    |      |

|                                                                                     |                                                                                                                              |                      |                      |                        |                       |           |
|-------------------------------------------------------------------------------------|------------------------------------------------------------------------------------------------------------------------------|----------------------|----------------------|------------------------|-----------------------|-----------|
| 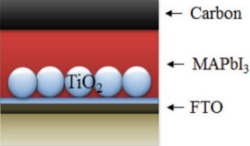   | <p>MAPbI<sub>3</sub></p>                                                                                                     | <p>0.07<br/>1.00</p> | <p>1.04<br/>0.99</p> | <p>21.27<br/>19.63</p> | <p>14.38<br/>9.72</p> | <p>40</p> |
|    | <p>FA<sub>x</sub>MA<sub>1-x</sub><br/>PbI<sub>y</sub>Br<sub>3-y</sub></p>                                                    | <p>0.1</p>           | <p>1.08</p>          | <p>23.33</p>           | <p>19.2</p>           | <p>16</p> |
|    | <p>Cs<sub>0.05</sub>(FA<sub>0.85</sub>MA<sub>0.15</sub>)<sub>0.95</sub>Pb(I<sub>0.85</sub>Br<sub>0.15</sub>)<sub>3</sub></p> | <p>1.30</p>          | <p>1.05</p>          | <p>22.78</p>           | <p>18.65</p>          | <p>35</p> |
|   | <p>CsFA<sub>0.83</sub>MA<sub>0.17</sub>PbI<sub>2.53</sub>Br<sub>0.47</sub></p>                                               | <p>0.115</p>         | <p>1.09</p>          | <p>21.1</p>            | <p>15.3</p>           | <p>32</p> |
|  | <p>CH<sub>3</sub>NH<sub>3</sub>PbI<sub>3</sub></p>                                                                           | <p>0.08</p>          | <p>1.002</p>         | <p>21.30</p>           | <p>13.53</p>          | <p>25</p> |
|  | <p>FA<sub>x</sub>MA<sub>1-x</sub><br/>PbI<sub>y</sub>Br<sub>3-y</sub></p>                                                    | <p>1.0</p>           | <p>1.01</p>          | <p>20.48</p>           | <p>12.34</p>          | <p>34</p> |
|  | <p>CsPbI<sub>3</sub></p>                                                                                                     | <p>0.08</p>          | <p>0.80</p>          | <p>18.58</p>           | <p>10.55</p>          | <p>50</p> |

|                                                                                   |                    |      |       |       |      |    |
|-----------------------------------------------------------------------------------|--------------------|------|-------|-------|------|----|
| 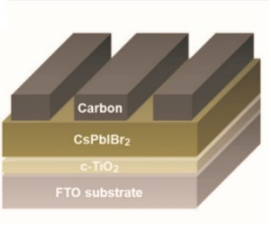 | $\text{CsPbIBr}_2$ | 0.09 | 1.245 | 10.66 | 9.16 | 33 |
|-----------------------------------------------------------------------------------|--------------------|------|-------|-------|------|----|

**Table S2.** Parameters of the TRPL spectroscopy based on the pristine perovskite films and perovskite/carbon sample with various carbon sources.

$$Y(t) = A_1 e^{-t/\tau_1} + A_2 e^{-t/\tau_2} + y_0 \quad *$$

MERGEFORMAT (1)

$$\tau_{ave} = \frac{A_1 \tau_1}{A_1 \tau_1 + A_2 \tau_2} \tau_1 + \frac{A_2 \tau_2}{A_1 \tau_1 + A_2 \tau_2} \tau_2 \quad *$$

MERGEFORMAT (2)

| Sample     | $\tau_1$ (ns) | Standard error | $\tau_2$ (ns) | Standard error | $\tau_{ave}$ (ns) |
|------------|---------------|----------------|---------------|----------------|-------------------|
| Perovskite | 25.94         | 0.89           | 437.97        | 11.55          | 254.91            |
| MWCNT      | 4.94          | 0.17           | 43.65         | 0.83           | 21.65             |
| Graphene   | 3.64          | 0.12           | 68.98         | 1.36           | 29.28             |
| CNC        | 15.35         | 0.83           | 133.66        | 9.56           | 51.77             |

**Table S3.** Parameters of the ultraviolet photoelectron spectra based on different carbon sources.

$$\phi = 21.2 - E_{cutoff} + E_{Fermi} \quad *$$

MERGEFORMAT (3)

| Carbon Sources | $E_{cutoff}$<br>(eV) | $E_{Fermi}$<br>(eV) | Work function<br>(eV) |
|----------------|----------------------|---------------------|-----------------------|
| CNT            | 16.67                | 0.49                | 5.02                  |
| CNC            | 16.72                | 1.65                | 6.13                  |
| Graphene       | 16.75                | 0.69                | 5.14                  |



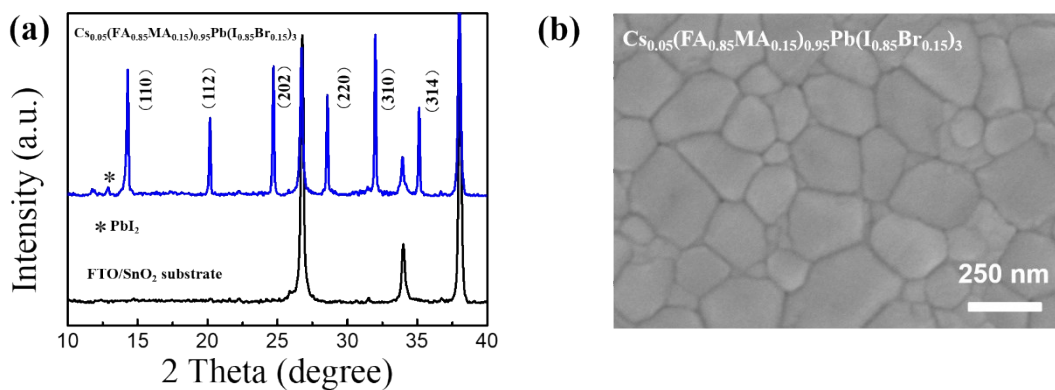

**Fig. S1.** (a) XRD patterns of the as-grown perovskite films. (b) top-view SEM images of perovskite films.

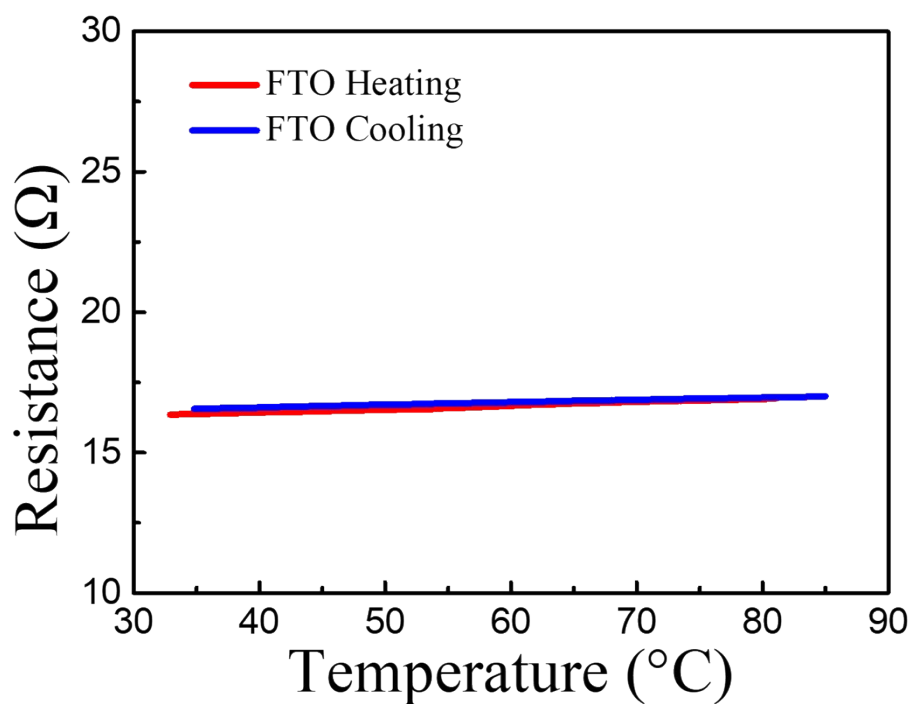

**Fig. S2.** The resistance- temperature curves of FTO film under heating and cooling process.

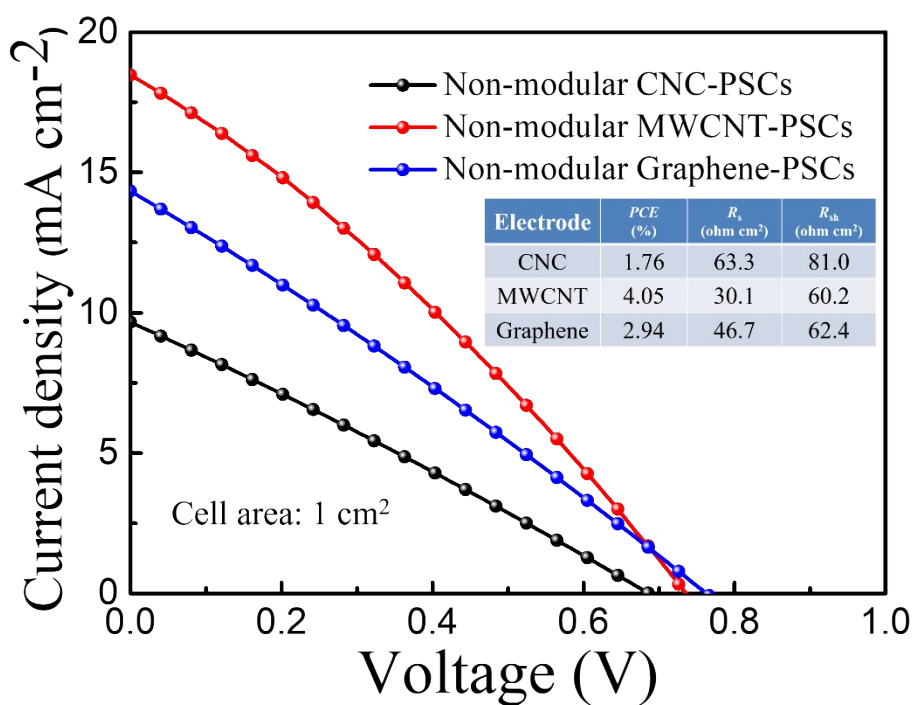

**Fig. S3.** J-V curves (cell area: 1 cm<sup>2</sup>) under solar simulator AM 1.5 of different carbon-based non-modular PSCs (CNC, MWCNT, Graphene).

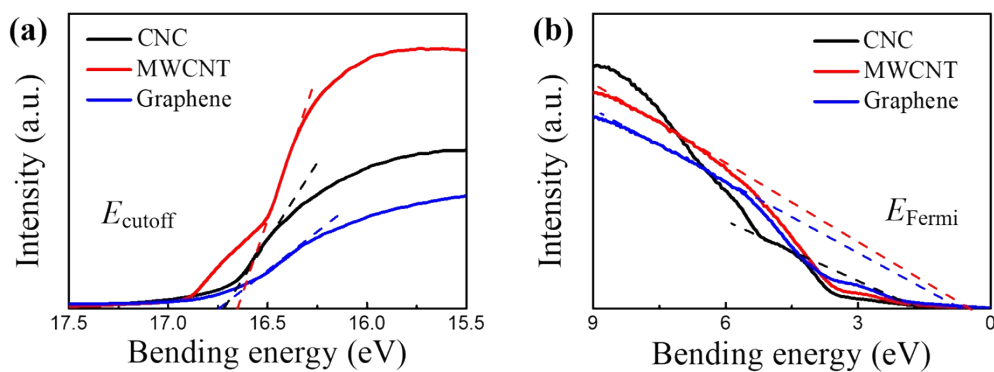

**Fig. S4.** (a) the cut-off energy (left part of Fig.4c) and (b) Fermi edge (right part of Fig.4c)

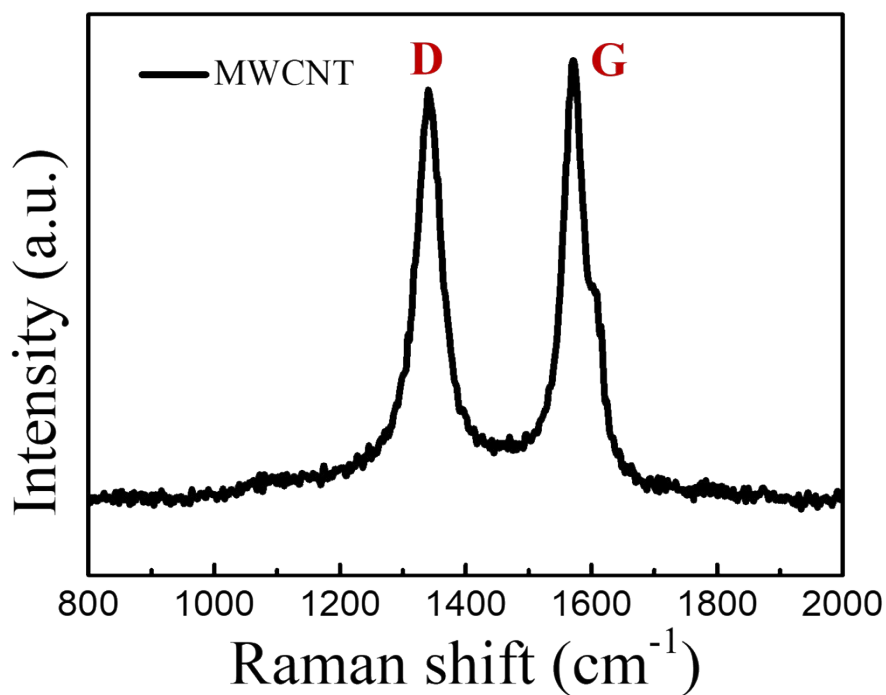

**Fig. S5.** Raman spectra of MWCNT, where the D-band originated from structural defects in carbon materials; the other G-band originated from graphite structure.

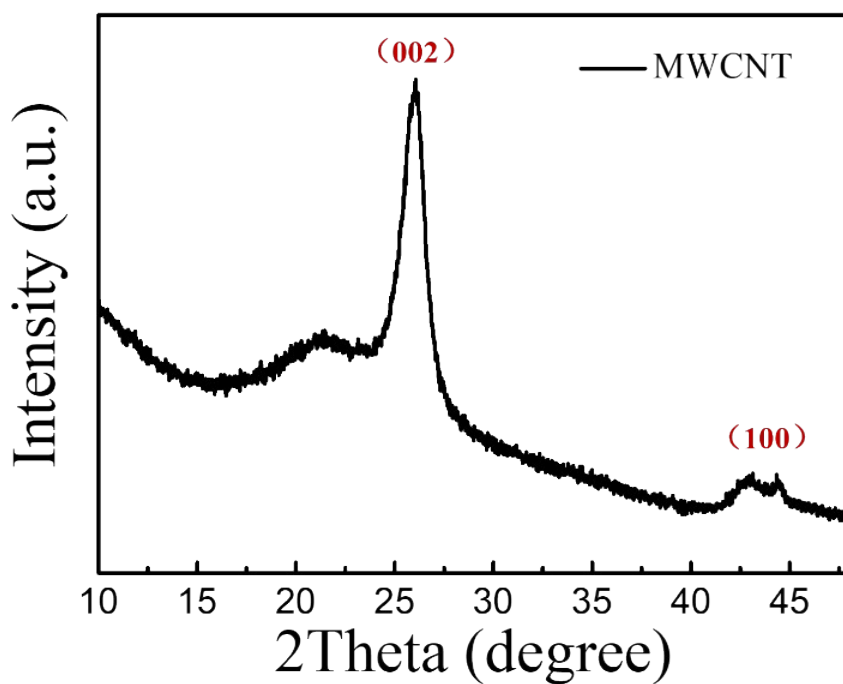

**Fig. S6.** XRD spectra of MWCNT.



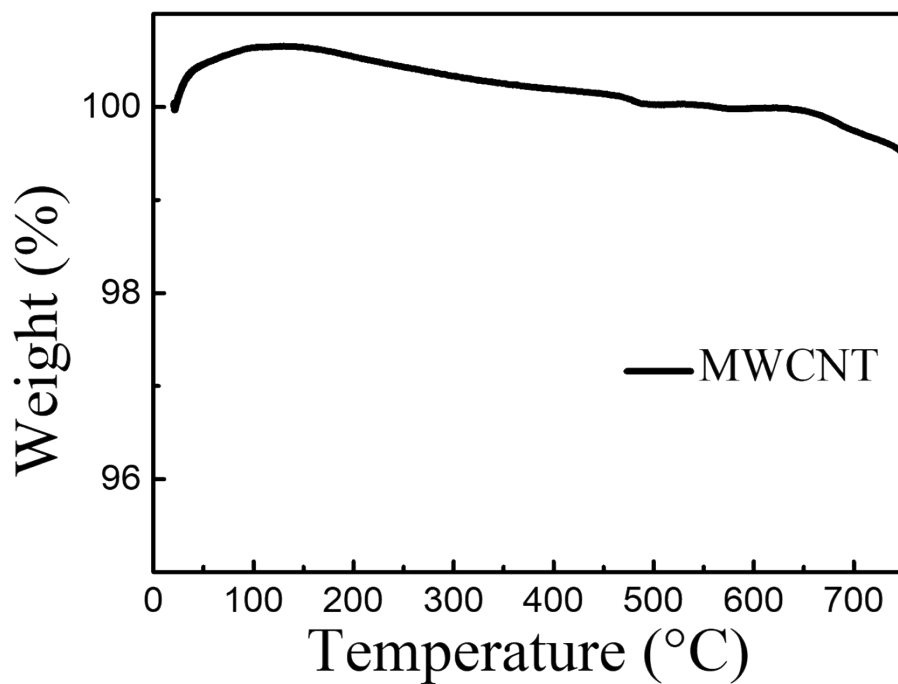

**Fig. S7.** Thermo gravimetric analysis (TGA) plot of MWCNT, which a convinced sign of thermal stability in the range of 25-800 °C.

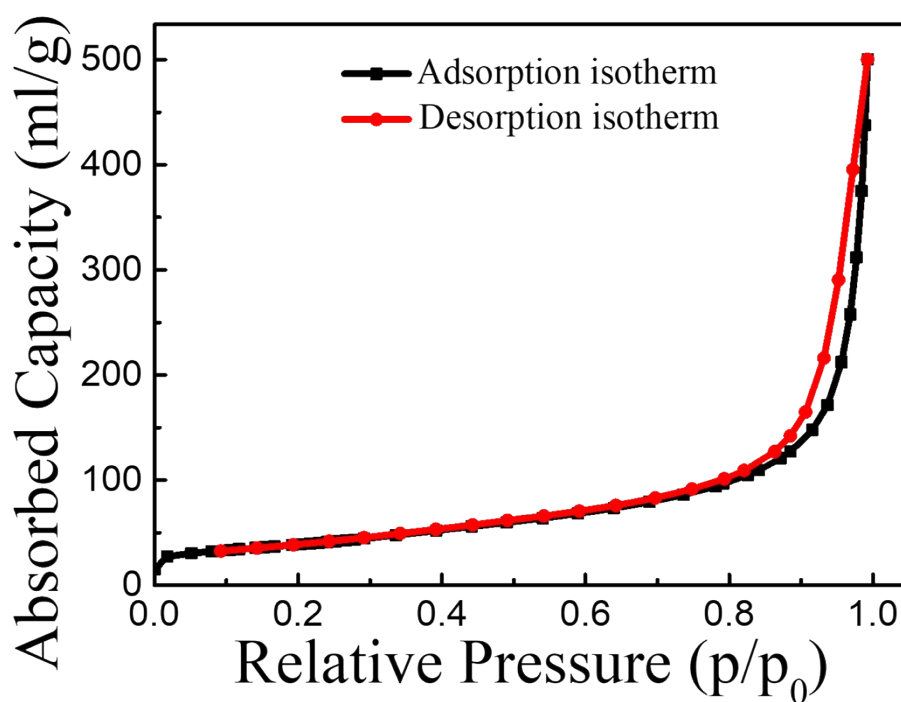

**Fig. S8.** Isotherm linear plot of MWCNT, and the specific surface area was 138.56 m<sup>2</sup>/g.

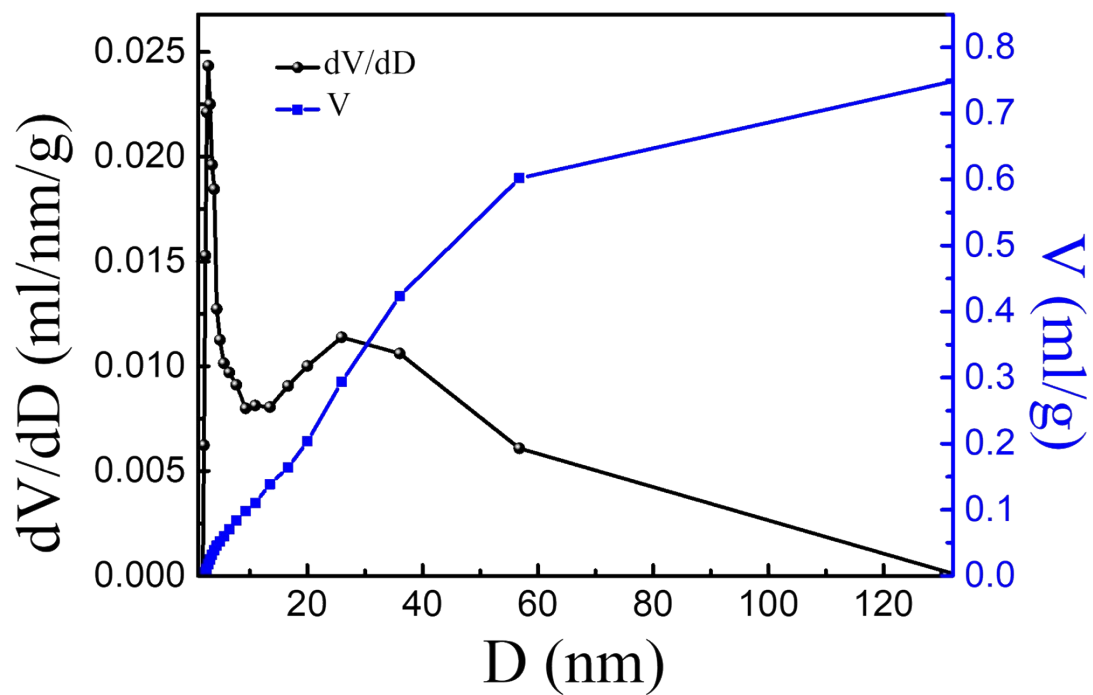

**Fig. S9.** Barrett-Joyner-Halenda (BJH desorption) pore volume & pore size curve of MWCNT, where the pore volume was 0.75 ml/g, the pore size was 16.31 nm.
